# Supplementary material for: Substance Use Onset in High-Risk 9-13 Year-Olds in the ABCD Study
Source: bioRxiv or medRxiv preprint supplement (doi:10.1101/2021.08.10.21261808), 2021-09-16
Supplement: Supplementary file [file media-1.pdf]

## Self-Report, Hair Toxicology, and Acute Toxicology

All ABCD participants completed a substance use interview, including a 12-month Timeline Follow-Back if they reported any substance use. In addition, all participants were asked to give a sample of their hair for analysis. Ten percent of participants were randomly selected to undergo some or all of the following acute toxicology tests: breathalyzer test, urinary cotinine screen, and/or oral fluid testing. Finally, participants who reported any past year substance use were given all three acute toxicology assessments. Data reported in Table S2 show self-reported substance use, detailed hair toxicology results, and acute toxicology results in participants who had positive hair results.

**Table S2.** Positive other toxicology results and self-reported use endorsements for participants with confirmed positive hair results, by drug class.

| Positive result per self-report or biospecimen: | Cocaine (n=13) | Opiates (n=2) | Amphetamines (n=63) | THCCOOH (n=26) | Natural Cannabinoids (n=21) | Alcohol (n=10) | Nicotine (n=25) |
|-------------------------------------------------|----------------|---------------|---------------------|----------------|-----------------------------|----------------|-----------------|
| Self-Reported use:                              |                |               |                     |                |                             |                |                 |
| Alcohol sips                                    | 38%            | 50%           | 38%                 | 46%            | 5%                          | 60%            | 52%             |
| Alcohol full drink                              | 0%             | 0%            | 0                   | 4%             | 5%                          | 0%             | 0%              |
| Nicotine puffs                                  | 15%            | 50%           | 5%                  | 15%            | 19%                         | 10%            | 24%             |
| Nicotine more than puff                         | 8%             | 0%            | 0                   | 8%             | 10%                         | 10%            | 12%             |
| Cannabis puff                                   | 8%             | 50%           | 0                   | 12%            | 10%                         | 10%            | 8%              |
| Cannabis more than puff                         | 8%             | 50%           | 0                   | 4%             | 15%                         | 10%            | 4%              |
| Other drugs                                     | 0%             | 0%            | 0%                  | 0%             | 0%                          | 0%             | 0%              |
| Hair analyte confirmation <sup>b</sup> :        |                |               |                     |                |                             |                |                 |
| Cocaine <sup>d</sup>                            | 13/13          |               |                     |                |                             |                |                 |
| Benzoyllecgonine                                | 12/12          |               |                     |                |                             |                |                 |
| Norcocaine                                      | 2/11           |               |                     |                |                             |                |                 |
| Oxymorphone <sup>c</sup>                        |                | 2/2           |                     |                |                             |                |                 |
| Amphetamines <sup>e</sup>                       |                |               | 52/62               |                |                             |                |                 |
| Methamphetamine                                 |                |               | 9/51                |                |                             |                |                 |
| THCCOOH                                         |                |               |                     | 25/26          | 9/10                        |                |                 |
| THC                                             |                |               |                     | 10/11          | 21/21                       |                |                 |
| CBN                                             |                |               |                     | 3/6            | 5/7                         |                |                 |

|                                        |                  |     |                    |     |                  |      |                  |
|----------------------------------------|------------------|-----|--------------------|-----|------------------|------|------------------|
| CBD                                    |                  |     |                    | 5/8 | 7/10             |      |                  |
| THCV                                   |                  |     |                    | 0/3 | 0/4              |      |                  |
| ETG                                    |                  |     |                    |     |                  | 9/10 |                  |
| Cotinine                               |                  |     |                    |     |                  |      | 18/25            |
| 3-hydroxycotinine                      |                  |     |                    |     |                  |      | 6/11             |
| Norcotinine                            |                  |     |                    |     |                  |      | 0/0              |
| Nornicotine                            |                  |     |                    |     |                  |      | 8/8              |
| Draeger oral fluid test <sup>f</sup> : |                  |     |                    |     |                  |      |                  |
| Amphetamine                            | 1/1 <sup>a</sup> | 0/0 | 33/33 <sup>a</sup> | 0/3 | 2/3 <sup>a</sup> | 0/0  | 2/4 <sup>a</sup> |
| NicAlert <sup>g</sup>                  | 0/4              | 0/0 | 0/2                | 1/3 | 1/3              | 0/0  | 1/1              |

Notes: 11-nor-9-carboxy-tetrahydrocannabinol = THCCOOH, Δ9-tetrahydrocannabinol = THC, cannabidiol = CBD, cannabinol = CBN, Δ9-tetrahydrocannabivarin = THCv; ETG=ethyl glucuronide

<sup>a</sup> Positive results are consistent with the youth's prescription medication

<sup>b</sup> Variation in analyte n due to insufficient quantity of hair (e.g., norcocaine; THCv)

<sup>c</sup> Other opioids tested for (fentanyl, codeine, morphine, 6-acetylmorphine, hydrocodone, hydromorphone, and oxycodone) were negative for all.

<sup>d</sup> Other cocaine metabolites tested for (cocaethylene, methylenedioxycocaine, orthohydroxycocaine, and parahydroxycocaine) were all negative.

<sup>e</sup> Other amphetamines tested for (MDA, MDEA, and MDMA) were all negative.

<sup>f</sup> Seven drug classes (cocaine, opiates, cannabis, benzodiazepines, amphetamine, methamphetamine, and methadone) were tested as described in the primary manuscript. Only drug classes with a positive are displayed here.

<sup>g</sup>NicAlert is a urinary cotinine screen. Positive results on NicAlert here indicate urinary cotinine results at a level which indicates recent, personal nicotine exposure.
